# Supplementary material
Source: Springer Nature journal article supplement (https://www.springermedizin.de/resource/supplementary/12933_2010_269_MOESM1_ESM.doc/9539980)
Supplement: MOESM1 [file 9539980]

**Table 1:** General and demographic variables in cases and controls

|  | **pts with diabetic foot** | **pts without diabetic foot** | **p** |
| --- | --- | --- | --- |
| **n:** | 34 | 37 | 0.75 |
| **Age** | 66.7 ± 8.5 | 66.9 ± 7.9 | 0.027 |
| **Sex Male (n /%)** | 16 ( 47,1%) | 15 (41,7% ) | 0.41 |
| **Diabetes duration**   - **<10 yrs** - **=10 yrs** - **=20 yrs** | 7 (20,6%)  8 (23.5%)  19 (55.9) | 21 (58,3% )  11 (30.6% )  4 (11.1%) | 0.027  0.045  <0.001 |
| **treatment**   - **Diet (n /%)** - **Antidiabetici orali (n /%)** - **Mixed (n /%)** - **Insulin (n /%)** | 4 (11,8 )  3 (8.8 )  6 (17.5 )  21 (61.8 ) | 3 ( 8.3%)  10 ( 27.8%)  13 (36,1% )  10 ( 27.8 ) | 0.65  <0.001  <0.001  <0.001 |
| **Smoking (n /%)** | 7 (20,6) | 9 (25) | 0.71 |
| **Hypertension ( n /%)** | 20 (58,8) | 25 (69.4) | 0.041 |
| **Dyslipidaemia (n /%)** | 14 (41,2) | 16 (44.4) | 0.35 |
| **Obesity (n /%)** | 19 (55,9) | 13 (36.1) | 0.021 |
| **Chronic renal failure (n /%)** | 15 (44,1) | 13 (36.1) | 0.064 |
| **Mycroalbuminuria (n /%)** | 22 (64,7) | 6 ( 14,7) | <0.001 |
| **Retinopathty (n /%)** | 19 (55,9) | 36 ( 100) | <0.001 |
| **PAD (n /%)** | 10 (29.41) | 9 ( 25) | 0.54 |
| **CAD (n /%)** | 17 ( 50) | 7 (19,4) | <0.001 |
| **TIA/ Stroke (n /%)** | 14 (41.17) | 6 (16.66) | 0.021 |
| **Other district atherosclerosis (n /%)** | 28 (82.35 | 21 (58.33) | <0.001 |
| **Artropathy (n /%)** | 11 (32,4%) | 2 (5.6%) | <0.001 |
| **Neuropathy (n /%)** | 25 (73.52) | 14 ( 38.88%) | <0.001 |
| **Diabetic foot grade**  **Grade 0**  **Grade 1**  **Grade 2**  **Grade 3**  **Grade4**  **Grade 5**  **Grade 6** | 1 (2,9%)  **6 ( 17,6%)**  **8 (23,5%)**  **10 ( 29,4%)**  **4 (11,8%)**  **1 (2,9%)**  **4 (11,8%)** | -  -  -  -  -  -  - |  |

Data are expressed as median and interquartile (lower and upper quartile)

PAD: peripheral artery disease ; CAD: coronary artery disease ,

**Table 2: L**aboratory variables in cases and controls

|  | **Diabetic foot patients** | **Diabetics without foot complications** | **p** |
| --- | --- | --- | --- |
| **HbA1c** | 8 (7.28-9.40) | 6.85 (6.10-8.00) | **0.018** |
| **CRP** | 4 (2.25-5.15 ) | 2.25 (1.90-3.08) | **0.041** |
| **Total cholesterol ( mg/dl)** | 215.50 (166,50-243,00) | 204.00 (185,50- 210,00) | 0.054 |
| **LDL cholesterol ( mg/dl)** | 121.70 (98,75-148,75) | 104.50 (78,00-123,00) | **0.032** |
| **Tryglicerids ( mg/dl)** | 160.50 (119,50-209,25) | 180.50 (144,50-199,00) | **0.012** |
| **Globuli bianchi** | 12.675 (10775,00-14140,00 ) | 10.700 (8850,00-12027,50) | **0.032** |
| **Adiponectin (µg/ml)** | 7.1450 ( 4.47-12.17) | 8.480 (5.15-12.87) | **0.022** |
| **Resistin (ng/ml)** | 5.160 (2.96-6.29) | 3.290 (2.37-6.5) | **0.021** |
| **IL-6 (pg/ml)** | 3.21 (1.23-5.34) | 2.13 ( 1.24-3.97 ) | **0.033** |

Demographic and anamnestic data are expressed as n° (percentage) ;HbA1c: Hemoglobin A1c ; CRP: C-reactive protein ; IL-6: Interleukin-6

**Table 3: Correlation analysis between adiponectin, resistin and IL-6 plasma levels and laboratory and clinical variables in patients with diabetic foot**

|  |  | |  | |  | |
| --- | --- | --- | --- | --- | --- | --- |
| **Adiponectin** | | **Resistin** | | **IL-6** | |
| **Variable** | **r** | **p** | **r** | **p** | **r** | **p** |
| **Sex ( male)** | 0.11 | 0.87 | 0.10 | 0.83 | 0.14 | 0.79 |
| **Diabetes duration** | **-0.37** | **<0.05** | **0.33** | **<0.05** | **0.29** | **0.027** |
| **Smoking** | 0.12 | 0.67 | 0.09 | 0.12 | 0.09 | 0.12 |
| **Hypertension** | **-0.32** | **<0.05** | **0.29** | **0.022** | **0.28** | **0.020** |
| **Dyslipidaemia** | **-0.29** | **0.032** | **0.27** | **0.041** | **0.25** | **0.037** |
| **BMI** | **-0.39** | **<0.0001** | **0. 29** | **0.022** | 0.10 | 0.20 |
| **Chronic renal failure** | 0.11 | 0.23 | 0.17 | 0.81 | 0.19 | 0.88 |
| **Mycroalbuminuria** | 0.11 | 0.08 | 0.13 | 0.64 | **0.29** | **<0.05** |
| **Retinopathy** | **-0.28** | **0.040** | **0.26** | **0.031** | **0.26** | **0.021** |
| **PAD** | 0.10 | 0.55 | 0.11 | 0.34 | **0.30** | **<0.05** |
| **CAD** | 0.14 | 0.77 | 0.11 | 0.67 | 0.11 | 0.67 |
| **Previous TIA/ Stroke** | **-0.29** | **<0.05** | **0.31** | **<0.0001** | **0.32** | **<0.0001** |
| **Neuropathy** | **-0.31** | **<0.0001** | **0.33** | **<0.0001** | **0.34** | **<0.0001** |
| **Diabetic foot grade** | **-0.29** | **<0.05** | **0.32** | **<0.0001** | **0.30** | **<0.0001** |

BMI: body mass index; PAD: peripheral artery disease; CAD: coronary artery disease

**Table 4. Cox regression analysis of clinical and laboratory variables associated with diabetic foot presence**

|  | **Univariate analysis** | | | **Multivariate analysis** | | |
| --- | --- | --- | --- | --- | --- | --- |
|  | **Regression coefficient** | **Hazard ratio (95% CI)** | **P value** | **Regression coefficient** | **Hazard ratio (95% CI)** | **P value** |
| **Age** | **0.69** | **2.32 (1.78-5.19)** | **0.021** | **0.49** | **2.12 (182-4.48)** | **0.031** |
| Diabetes duration (y) | **1.56** | **7.26 (3.80-13.87)** | **0.001** | **1.21** | **5.67 (2.70-8.34)** | **0.001** |
| Hypercholesterolemia | **0.59** | **1.55 (1.16-2.64)** | **0.21** | **0.44** | 0.87 (0.166-1.62) | 0.42 |
| **Hypertension ( n /%)** | **0.32** | 0.78 (1.70-4.34) | 0.33 | 0.39 | 0.67 (0.30-1.12) | 0.71 |
| **Obesity (n /%)** | **0.32** | 0.86 ( 0.31-1.23) | 0.23 | 0.29 | 0.77 ( 0.42-0.98) | 0.56 |
| **Chronic renal failure (n /%)** | **0.11** | 0.89 ( 0.53-1.31) | 0.35 | 0.11 | 0.59 ( 0.21-0.89) | 0.71 |
| **Mycroalbuminuria (n /%)** | **0.41** | **1.87 ( 1.32-3.51)** | **0.018** | **0.41** | **1.55 ( 1.11-2.99)** | **0.032** |
| **Retinopathty (n /%)** | **0.33** | **2.31 ( 1.78-4.78)** | **0.012** | **0.33** | **1.99 ( 1.45-3.24)** | **0.021** |
| **PAD (n /%)** | **0.61** | **3.5 ( 2.7-4.1)** | **0.005** | **0.59** | **2.9 ( 2.1-3.8)** | **0.005** |
| **CAD (n /%)** | **0.54** | **1.6 ( 1.4--2.7)** | **0.033** | 0.54 | 0.89 ( 0.5-1.1) | 0.56 |
| **TIA/ Stroke (n /%)** | **0.42** | **1.4 ( 1.21-2.09)** | **0.041** | 0.42 | 0.78 (0.33-0.91) | 0.44 |
| **IL-6** | **1.12** | **4.8 ( 3.1-5.5)** | **0.005** | **0.98** | **3.6 ( 2.8-4.1)** | **0.005** |
| **Resistin** | **0.49** | **2.1 ( 1.4-3.9)** | **0.041** | **0.43** | **1.78 (1.4-2.9)** | **0.031** |
| **Adyponectin** | **-0.29** | **-3.4 ( -1.9-3.6)** | **0.001** | **-0.29** | **-2.9 (-1.5-3.4)** | **0.001** |
